1 Regulation of coordinated muscular relaxation by a pattern-  
2 generating intersegmental circuit

3

4 Atsuki Hiramoto<sup>1</sup>, Julius Jonaitis<sup>2</sup>, Sawako Niki<sup>1,3</sup>, Hiroshi Kohsaka<sup>1</sup>, Richard  
5 Fetter<sup>4</sup>, Albert Cardona<sup>4,5</sup>, Stefan Pulver<sup>2</sup>, Akinao Nose<sup>1,6,\*</sup>

6

7 <sup>1</sup>Department of Complexity Science and Engineering, Graduate School of  
8 Frontier Sciences, The University of Tokyo, 5-1-5 Kashiwanoha, Kashiwa, Chiba  
9 277-8561, Japan

10 <sup>2</sup>School of Psychology and Neuroscience, University of St Andrews, St Mary's  
11 Quad, South Street, St Andrews, KY16 9JP, UK

12 <sup>3</sup>Research Center for Advanced Science and Technology, The University of  
13 Tokyo, 4-6-1 Komaba, Meguro-ku, Tokyo 153-8904, Japan

14 <sup>4</sup>HHMI Janelia Research Campus, Ashburn, VA 20147, USA

15 <sup>5</sup>Department of Physiology, Development and Neuroscience, University of  
16 Cambridge, Cambridge, CB2 3DY, UK

17 <sup>6</sup>Department of Physics, Graduate School of Science, The University of Tokyo, 7-  
18 3-1 Hongo, Bunkyo-ku, Tokyo 113-0033, Japan

19 \*Corresponding author

20 Address correspondence to Akinao Nose at:

21 Department of Complexity Science and Engineering,

22 Graduate School of Frontier Sciences, The University of Tokyo,

23 Kashiwanoha 5-1-5, Kashiwa, Chiba 277-8561, Japan

24 Tel: 81-4-7136-3919; Fax: 81-4-7136-3919

25 e-mail: [nose@k.u-tokyo.ac.jp](mailto:nose@k.u-tokyo.ac.jp)

26

## 27 **Abstract**

28

29 Typical patterned movements in animals are achieved through combinations of  
30 contraction and delayed relaxation of groups of muscles. However, how intersegmentally  
31 coordinated patterns of muscular relaxation are regulated by the neural circuits remain  
32 poorly understood. Here, we identify Canon, a class of higher-order premotor  
33 interneurons, that regulates muscular relaxation during backward locomotion of  
34 *Drosophila* larvae. Canon neurons are cholinergic interneurons present in each  
35 abdominal neuromere and show wave-like activity during fictive backward locomotion.  
36 Optogenetic activation of Canon neurons induces relaxation of body wall muscles,  
37 whereas inhibition of these neurons disrupts timely muscle relaxation. Canon neurons  
38 provide excitatory outputs to inhibitory premotor interneurons. Canon neurons also  
39 connect with each other to form an intersegmental circuit and regulate their own wave-  
40 like activities. Thus, our results demonstrate how coordinated muscle relaxation can be  
41 realized by an intersegmental circuit that regulates its own patterned activity and  
42 sequentially terminates motor activities along the anterior-posterior axis.

43

## 44 **Introduction**

45 One of the major goals in neuroscience is to understand how neural circuits regulate  
46 movements. Animal movements are generated by sequential contraction and relaxation

47 of muscles present in different parts of the body<sup>1-3</sup>. While muscle contraction provides  
48 the force for moving, timely muscular relaxation is also required for coordinated  
49 movements to occur<sup>4-7</sup>. For instance, while a particular muscle (e.g., a limb extensor) is  
50 contracted, its antagonistic muscle (e.g., a flexor) must be relaxed. Similarly, muscles in  
51 different parts of the body whose simultaneous contraction hinders appropriate body  
52 movements must be coordinately contracted and relaxed. Muscle relaxation is thought  
53 to be particularly important for fine control of movements required during playing sports  
54 and musical instruments<sup>8</sup>. Conversely, deficits in muscle relaxation have been  
55 associated with a wide spectrum of movement disorders such as myotonic dystrophy,  
56 Parkinson disease and dystonia<sup>8-10</sup>.

57         Muscle contraction ends when transmission from motor neurons (MNs) is  
58 terminated, allowing muscle relaxation. Inhibitory motor neurons are present in some  
59 invertebrate species and play important roles in tuning muscle relaxation to meet  
60 behavioural demands<sup>11-13</sup>. However, termination of MN activity by upstream premotor  
61 circuits is also a major mechanism for regulating muscle relaxation. Previous studies in  
62 vertebrates and invertebrates have identified a number of premotor interneurons that  
63 play roles in patterning motor activities<sup>1-3,14,15</sup>. Although much is known about the timing  
64 of muscle contraction, such as how left-right or flexor-extensor alteration is regulated by  
65 the premotor circuits, less is known about the cellular and circuit mechanisms of  
66 interneuron coordinated muscle relaxation<sup>6,7</sup>.

67         *Drosophila* larval locomotion is an excellent model for investigation of  
68 sensorimotor circuits at the single cell level<sup>16-18</sup> (Fig. 1a). The larva has a segmented  
69 body and normally moves by forward locomotion. However, when exposed to noxious  
70 stimulus to the head, it performs backward locomotion as an escape behavior<sup>16,19,20</sup>.  
71 Forward and backward locomotion are symmetric axial movements achieved by

72 propagation of muscular contraction and relaxation along the body. In both forward and  
73 backward peristalses, contraction and relaxation of muscles occur in a segmentally  
74 coordinated manner so as to generate a coherent behavioral output<sup>21,22</sup>. Recent studies  
75 identified several classes of segmental premotor interneurons that regulate various  
76 aspects of larval peristaltic locomotion, including speed of peristaltic propagation, left-  
77 right coordination and sequential contraction of antagonistic muscles<sup>5,23–25</sup>. However,  
78 none have been shown to be essential for generating the propagation of axial activity.  
79 Neither have any been shown to be essential for normal patterns of muscle relaxation  
80 during peristaltic locomotion.

81 Here, we report on the identification of a novel class of segmentally repeated  
82 cholinergic interneurons, that we have named Canon (cholinergic ascending neurons  
83 organizing their network) neurons, which regulate timely muscular relaxation during  
84 larval backward locomotion. Canon neurons show segmentally propagating activities  
85 during backward but not forward fictive locomotion at a timing much later than MNs.  
86 Optogenetic activation of Canon neurons induced relaxation of body wall muscles,  
87 whereas their genetic inhibition severely delayed muscle relaxation. Connectomics  
88 analysis (reconstruction of circuit structures in serial electron microscopy (EM) images<sup>26</sup>)  
89 revealed that Canon neurons send outputs to a large number of interneurons, but are  
90 particularly strongly connected to a group of first-order inhibitory premotor interneurons.  
91 Taken together, our results suggest that Canon neurons regulate muscle relaxation by  
92 providing delayed excitation to inhibitory premotor interneurons. We also found that  
93 Canon neurons in abdominal neuromeres connect with each other to form an  
94 intersegmental network that regulates their own propagating activities. Thus, our results  
95 demonstrate how coordinated muscle relaxation can be regulated by the action of a  
96 pattern-generating intersegmental circuit.

97

## 98 **Results**

### 99 **Canon neurons are ascending interneurons active during backward but not** 100 **forward locomotion.**

101 Neurons that regulate specific motor patterns are often recruited in a manner related to  
102 the pattern. To identify neurons related to backward locomotion, we searched for  
103 interneurons showing backward-specific activity propagation by calcium imaging. We  
104 identified among the neurons targeted by *R91C05-Gal4* a novel class of segmentally  
105 repeated interneurons that we termed ‘Canon’ due to their distinctive morphological  
106 and functional features. These neurons showed wave-like activity propagation in the  
107 backward direction but not in the forward direction (Fig. 1b, Supplementary Fig. 1a, b,  
108 and Supplementary Movie 1). Since *R91C05-Gal4* only targets Canon neurons in  
109 abdominal neuromeres A3-A5, we also generated an independent Gal4 line, *Canon-*  
110 *spGal4*, which drives expression in Canon neurons in A1-A6 neuromeres  
111 (Supplementary Fig. 1c). To study the timing of Canon neuron activity relative to MNs,  
112 we conducted simultaneous calcium imaging of Canon neurons and aCC MNs (Fig. 1c,  
113 d, Supplementary Fig. 1d, e, and Supplementary Movie 2)<sup>27,28</sup>. Canon neurons were  
114 activated after aCC MNs in the same neuromere and at a similar timing to aCC MNs in  
115 neuromeres 2–3 segments more anterior suggesting possible roles in the termination  
116 of segmental motor activity (Fig. 1d and Supplementary Fig. 1e). The dual calcium  
117 imaging also confirmed that Canon neurons were activated during fictive backward but  
118 not forward locomotion (Fig. 1c).

119 We next studied the neurite morphology and neurotransmitter phenotype of  
120 Canon neurons. We generated single-cell clones of Canon neurons using the MultiColor  
121 FLP-Out (MCFO) method<sup>29</sup>, and studied axon and dendrite extension of individual Canon

122 neurons (Fig. 1e, f). We also used the DenMark technique<sup>30</sup> to identify pre- (visualized  
123 with Syt-GFP) and post-synaptic (visualized with the DenMark marker) sites  
124 (Supplementary Fig. 1i). These analyses revealed characteristic morphological features  
125 of the Canon neurons, as detailed below. The cell bodies of Canon neurons were located  
126 in a ventrolateral region of the VNC (Fig. 1f) and extended an axon initially to the  
127 contralateral dorsal neuropil via the anterior commissure (Supplementary Fig. 1f), and  
128 then anteriorly to the T2 neuromere (Fig. 1e). The ascending axons sent collaterals in  
129 each of the two to three neuromeres anterior to the cell body and arborized presynaptic  
130 terminals in the dorsal neuropil, which are known to contain MN dendrites. Canon  
131 neurons expressed choline acetyltransferase (ChAT), a marker for cholinergic neurons,  
132 but not vesicular glutamate transporter (vGluT)<sup>31</sup>, a marker for Glu, or GABA, (Fig. 1g  
133 and Supplementary Fig. 1g, h), suggesting that Canon neurons are cholinergic and most  
134 likely excitatory. To summarize, Canon neurons are segmental ascending interneurons  
135 activated after MNs during backward locomotion.

136

### 137 **Optogenetic activation of Canon neurons induces muscular relaxation.**

138 Canon neurons are activated after MNs in each neuromere and send information via the  
139 ascending axons to anterior neuromeres, (i.e. in the opposite direction to backward  
140 propagation). Thus, Canon neurons may play roles in shutting down MN activities in  
141 anterior neuromeres during backward locomotion. To study this, we conducted gain-of-  
142 function experiments via optogenetic activation of Canon neurons. Since *R91C05-Gal4*  
143 and *Canon-spGal4* drove expression not only in Canon neurons but also in other  
144 neurons, including Wave neurons whose activation is known to induce backward  
145 locomotion and other escape behaviors<sup>20</sup>, they were not suitable for the gain-of-function  
146 analyses (Supplementary Fig. 1a, c, and Supplementary Fig. 2a, b). However, we found

147 that *R91C05-LexA* drove expression only in Canon neurons in neuromeres A1 to A3 (Fig.  
148 2a) and used this for the gain-of-function analysis. We expressed CsChrimson, a red-  
149 shifted Channelrhodopsin<sup>32</sup>, in Canon neurons, and optogenetically activated these  
150 neurons with short (5 sec) light pulses. When photostimulation was applied to control  
151 larvae, all animals continued forward locomotion since they are insensitive to red light.  
152 In contrast, when light was applied to experimental larvae undergoing forward  
153 locomotion, a majority of them (8 out of 10) halted and showed visible muscle relaxation  
154 (Fig. 2b and Supplementary Movie 3). We quantified the phenotype by counting the  
155 number of forward peristalses during light application and found it to be significantly  
156 reduced in the experimental group (Fig. 2c). These results are consistent with the idea  
157 that Canon neurons induce relaxation of body muscles.

158

### 159 **Canon neurons are required for proper muscular relaxation.**

160 We next studied whether Canon neurons are required for muscular relaxation during  
161 backward locomotion by conducting loss-of-function experiments. We expressed Kir2.1  
162 (inwardly-rectifying potassium channel)<sup>33</sup> in Canon neurons to suppress baseline  
163 excitability and observed muscle dynamics in dissected larvae undergoing spontaneous  
164 forward and backward peristalses (by visualizing muscles with *Mhc > GFP*<sup>34</sup>; Fig. 3a).  
165 We found that the muscular relaxation was disrupted and peristalses duration were  
166 prolonged during backward peristalses, but not forward peristalses, when Canon  
167 neurons' activity was suppressed (Fig. 3b, c, and Supplementary Movie 4).

168 To examine the phenotype more closely at the cellular level, we focused on a  
169 ventral longitudinal (VL) muscle (muscle 6) in segment A3 and measured the change in  
170 length of the muscle during peristalses (Fig. 3d). We then obtained the maximum speed  
171 of muscular relaxation and contraction and the duration of muscular contraction, and

172 compared the values between forward and backward peristalses and between the  
173 control and experimental groups (Fig. 3e-j). The quantification revealed that maximum  
174 relaxation speed was dramatically decreased and the duration of muscular contraction  
175 was prolonged during backward but not forward peristalses when Canon neuron function  
176 was inhibited. The result further supports the notion that Canon neurons regulate  
177 relaxation of muscles during backward peristalses. There was also a slight decrease in  
178 contraction speed during backward peristalses when Canon neurons were silenced (Fig.  
179 3h). Since Canon neurons are not active during the muscle contraction phase, this is  
180 likely an indirect consequence of the delayed muscular relaxation: it is well known that  
181 sensory feedback modulates the speed of locomotion, and it has been suggested that  
182 completion of muscular contraction and relaxation in one segment may activate the  
183 premotor circuits in the next segment via sensory feedback<sup>34</sup>.

184 The above experiments were conducted using *Canon-spGal4*, which targets  
185 Wave neurons in addition to Canon neurons, instead of the Canon-specific *R91C05-*  
186 *LexA*, since LexAop constructs suitable for the loss-of-function experiments were not  
187 available. Previous studies have shown that Wave neurons are not active during  
188 spontaneously occurring fictive locomotion and thus are unlikely to regulate the  
189 relaxation of muscles during peristalses. However, to further exclude the involvement of  
190 Wave neurons, we studied the effects of inhibiting Wave activity by using an independent  
191 Wave-specific Gal4 driver (*MB120B-spGal4*). No abnormality was seen in the muscular  
192 contraction or relaxation during forward and backward peristalses (Supplementary Fig.  
193 2c, d). Taken together, these results indicate that Canon neurons are required for proper  
194 muscular relaxation during backward peristalses.

195

196 **Canon neurons receive inputs from command systems for backward**



197 **locomotion.**

198 To further study how Canon neurons regulate muscular relaxation during backward  
199 locomotion, we elucidated the circuit structure around Canon neurons using  
200 reconstructions from a serial section transmission electron microscopy (ssTEM) image  
201 data set of an entire first instar larval CNS<sup>35</sup>. Since premotor circuits were the likely  
202 targets of Canon neurons and previous studies comprehensively reconstructed 1st-order  
203 premotor interneurons in neuromere A1<sup>26</sup>, we started reconstruction of Canon neurons  
204 in neuromeres A2 and A3, which arborize presynaptic sites in neuromere A1. We first  
205 uniquely identified Canon neurons in the existing ssTEM reconstruction based on the  
206 morphological features obtained from the single-cell MCFO clones (Fig1. e, f), and found  
207 them annotated as ‘A18g’ (Fig. 4a). We then extended the reconstruction to upstream  
208 and downstream synaptic partners of the Canon neurons (Figs. 4-6 and Supplementary  
209 Figs. 3-5). The upstream neurons with the largest synaptic occupation of the Canon  
210 neurons were: (1) thoracic descending neurons (ThDNs), (2) A27I interneurons, and (3)  
211 Canon neurons themselves (Fig. 4b-f and Supplementary Fig. 3a, b). ThDNs,  
212 descending neurons present in the thorax, are major components of the downstream  
213 circuits of mooncrawler descending neurons (MDNs), command neurons of backward  
214 locomotion located in the brain (Fig. 4f)<sup>36</sup>. A27I neurons, segmental interneurons present  
215 in the VNC, are major downstream partners of ThDNs<sup>36</sup>. In addition, Canon neurons  
216 receive direct inputs from MDNs. Thus, Canon neurons receive large synaptic inputs  
217 directly or indirectly from MDNs (Fig. 4f and Supplementary Fig. 3b). These results  
218 suggest that Canon neurons are recruited during backward locomotion by the backward  
219 command system. In addition to the MDN command system, Canon neurons receive  
220 major inputs from Canon neurons in other neuromeres and thus form a bidirectionally  
221 connected circuit composed of segmental homologues (hereafter called Canon-Canon

222 network) as will be detailed below. Thus, two major sources of inputs to Canon neurons  
223 are the MDN command system and the Canon-Canon network (Fig. 4f).

224

### 225 **Canon neurons provide outputs to inhibitory premotor circuits**

226 Major downstream partners of the Canon neurons include: (1) first-order premotor  
227 interneurons A06a, A06c, A31d, and A31k, (2) second-order premotor interneurons A02l  
228 and GVLI, (3) Canons themselves, and (4) intersegmental neurons located in the thorax  
229 or subesophageal zone (SEZ) named post Canon neuron 04, 23, and 05 (Fig. 5,  
230 Supplementary Fig. 3d, and Supplementary Fig. 4). Consistent with the notion that  
231 Canon neurons regulate muscular relaxation, all of the four first-order premotor  
232 interneurons appear to be inhibitory. A06a, A06c and A31k were previously identified as  
233 putatively inhibitory since they express GABA<sup>37,38</sup>. Another downstream premotor neuron  
234 A31d was putatively GABAergic because it belongs to the same lineage as A31b and  
235 A31k - premotor interneurons previously identified as GABAergic - and shares  
236 morphological characteristics to these neurons<sup>25,37,38</sup>. We confirmed that the premotor  
237 interneuron A06c, one of the strongest postsynaptic partners of Canon neurons was  
238 GABAergic (Supplementary Fig. 4a-c). We also verified that Canon neurons form  
239 synapses with A06c neurons using the sybGRASP method (Supplementary Fig. 4d, e).  
240 Each of these four classes of premotor interneurons in A1 received inputs from two  
241 Canon neurons located in neuromeres A2 and A3 and send outputs to MNs, most of  
242 which innervate longitudinal muscles located in the segments A1 and A2 (Fig. 5h). This  
243 circuit configuration predicts Canon neurons provide late-phase and prolonged inhibition  
244 to MNs during backward locomotion (see Discussion).

245         The second-order premotor neurons A02l and GVLI are segmentally repeated  
246 local interneurons (Fig. 5d, e, g, and Supplementary Fig. 3d)<sup>17,37,39,40</sup>. GVLI not only

247 receive inputs from Canon neurons directly but also indirectly via A02l neurons,  
248 suggesting that these two second-order premotor neurons function in closely related  
249 circuits (Fig. 5h). A previous study showed GVLl neurons are glutamatergic neurons  
250 whose optogenetic activation elicits muscular relaxation<sup>39</sup>. While GVLls formed direct  
251 synaptic contacts with MNs, a majority of the downstream targets were first-order  
252 premotor interneurons including the premotor interneuron, A31d, which is also a direct  
253 target of Canon neurons (Fig. 5h). GVLls show activities during fictive forward<sup>39</sup> and  
254 backward (this study, Supplementary Fig. 4f) locomotion. The fact that activation of  
255 GVLls, like that of Canon, induces muscular relaxation suggests that Canon neurons  
256 induce muscular relaxation in part by activating GVLls. To further study the role of GVLls,  
257 we conducted transient loss-of-function behavior analyses using the light-gated anion  
258 channel, GtACR1<sup>41</sup>, which was not available in the previous study<sup>39</sup>. Upon optogenetic  
259 inhibition, the larvae underwent rapid abdominal contraction (Fig. 5j). This suggests that  
260 GVLls inhibit inappropriate contraction of muscles during locomotion and corroborates  
261 the role of GVLls in the regulation of muscular relaxation. To summarize, major  
262 downstream targets of Canon neurons are Canon-Canon circuits and inhibitory premotor  
263 circuits including the first- and second order premotor interneurons, through which Canon  
264 neurons appear to induce muscular relaxation (Fig. 5h).

265

266 **Canon-Canon network regulates its own intersegmentally propagating**  
267 **activities.**

268 As mentioned above, Canon neurons connect bidirectionally with other Canon neurons  
269 (Fig. 6a-e and Supplementary Fig. 3b, d). We first noticed connections between Canon  
270 neurons in segments A2 and A3: the right Canon neuron in A2 forms synapses with the  
271 right Canon in A3 bidirectionally, in the bundle consisting of Canon neurons' ascending

272 axons. We extended the reconstruction to Canon neurons in neuromeres A4 and A5 and  
273 found bidirectional synaptic connections between all combinations of the four Canon  
274 neurons in A2-A5 (Supplementary Fig. 5). No synapses were seen between the right and  
275 left Canon neurons.

276 To study the roles of the Canon-Canon network in generating the wave-like  
277 activity of Canon neurons, we conducted loss-of-function analyses of the outputs of  
278 Canon neurons. In this experiment, we inhibited Canon neurons' chemical transmission  
279 by expressing tetanus toxin (TeTxLC)<sup>42</sup> and observed the Canon neurons' activity using  
280 calcium imaging. In this condition, inputs from other upstream neurons to the Canon  
281 circuits are not perturbed (Fig. 6e, f). If the pattern of Canon neurons' activity is solely  
282 generated by upstream neurons other than Canon neurons, the Canon neurons should  
283 show wave-like activity even if Canon neuron synapses are suppressed. However, if  
284 synaptic transmission between Canon neurons is required for the wave-like activity, it  
285 should be disrupted in this condition. We found that the latter was the case (Fig. 6g-i).  
286 When synaptic transmission by Canon neurons was inhibited, wave-like activity in Canon  
287 neurons was initiated but often failed to propagate all the way to the posterior end. This  
288 result suggests that synaptic transmission between Canon neurons is necessary for their  
289 own wave-like activity.

290 It is important to note that propagation of excitatory drive appears to be normal in  
291 all experimental animals (*Canon* > *TeTxLC*): the wave of muscular contraction  
292 propagated to the posterior ends in dissected larvae (Supplementary Fig. 6a-c). Thus,  
293 inhibition of synaptic transmission by Canon neurons specifically inhibits the propagation  
294 of their own activity crucial for muscular relaxation but leaves the propagation of the  
295 excitatory drive intact.

296

## 297 **Discussion**

298 Our study identified a new class of premotor interneurons, the Canon neurons, that  
299 regulate muscular relaxation, and revealed their cellular-level circuit structure, including  
300 the upstream backward command neurons and downstream inhibitory premotor circuits  
301 extending from the brain to the muscles. Moreover, we found that Canon neurons form  
302 synapses with each other to constitute a self-regulating circuit. Our results suggest that  
303 the Canon-Canon network is important, not only as an actuator of muscular relaxation in  
304 each segment, but also as the pattern generator of its own propagating activity during  
305 backward locomotion.

306

## 307 **Regulation of premotor inhibition and muscular relaxation**

308 For animal movements to occur in a patterned and coordinate manner, timing of not only  
309 muscle contraction but also muscle relaxation must be precisely controlled. In locusts,  
310 inhibitory GABAergic motor neurons have been shown to regulate muscle performance  
311 to optimize behavioral performance in a variety of contexts including postural control,  
312 predatory strikes, and escape movements<sup>12,43</sup>. Similarly, in the nematode *C. elegans*,  
313 patterns of spiking in excitatory and inhibitory motor neurons regulate muscle contraction  
314 and relaxation<sup>13,44</sup>. Motor neuron activity is also dependent on the activity of excitatory  
315 and inhibitory interneuron populations. While previous studies have identified a number  
316 of interneurons and circuits that regulate muscle contraction in various model systems,  
317 neural circuit mechanisms underlying the timing of muscle relaxation are less well  
318 explored<sup>6-8</sup>. Here, we revealed crucial roles played by Canon neurons in the regulation  
319 of muscle relaxation during backward locomotion of *Drosophila* larvae. The following  
320 evidence points to the role of Canon neurons in muscle relaxation, not contraction. First,  
321 Canon neurons are activated much later than the downstream MNs. Calcium imaging

322 showed that Canon neurons are active later than MNs in the same neuromere and at a  
323 similar timing as MNs in the next or third neuromere during fictive backward locomotion  
324 (corresponding to a phase delay of 1-2 neuromeres; Fig. 1d and Supplementary Fig. 1e).  
325 Additionally, EM reconstruction shows that Canon neurons (via premotor interneurons)  
326 connect to MNs in the next or third neuromere, in the opposite direction to backward  
327 wave propagation (generating a delay of 1-2 neuromeres; Fig. 5). Taken together, Canon  
328 neurons are activated with a delay corresponding to propagation in 2-4 neuromeres to  
329 their target MNs during fictive locomotion. This late onset of Canon activities implies roles  
330 in muscle relaxation not excitation. Second, optogenetic activation of Canon neurons  
331 induces muscle relaxation in the larvae (Fig. 2b, c). Third, loss-of-function of Canon  
332 neurons impaired muscle relaxation during backward peristalses of dissected larvae  
333 (Fig. 3). This indicates that orchestrating muscle relaxation pattern during backward  
334 waves is an active process requiring the activity of Canon neurons. Finally, Canon  
335 neurons target a number of premotor interneurons, which can potentially inhibit MNs.  
336 Since Canon neurons are cholinergic and thus likely excitatory, their activation, and in  
337 turn, downstream premotor interneurons, can terminate MN activity and thus induce  
338 muscle relaxation (Fig. 5). Taken together, our results reveal a circuit motif regulating  
339 muscle relaxation consisting of a second-order excitatory premotor interneuron (Canon)  
340 and a group of downstream inhibitory premotor interneurons, including both first-order  
341 (such as A06c) and second-order (such as GVLI) premotor neurons. While our results  
342 are consistent with this model for Canon neuron function on the time scales of activation  
343 studied, it is important to note that Canon neurons also connect to a large number of  
344 other interneurons that are not premotor inhibitory cells. This suggests that Canon  
345 neurons may also have additional functional roles mediated by other downstream  
346 partners.

347 Larval musculature consists of two groups of antagonistic muscles: longitudinal  
348 muscles that contract the body along the anterior-posterior axis, and transverse muscles  
349 that contract the body circumferentially<sup>45</sup>. These two groups of antagonistic muscles are  
350 activated at different times with the longitudinal muscles contracting earlier<sup>21,46</sup> during  
351 peristalses. Premotor interneurons immediately downstream of Canon neurons  
352 described above provide inhibitory inputs largely to longitudinal muscles rather than  
353 transverse muscles, suggesting that Canon neurons may primarily regulate the  
354 relaxation of a specific functional type of muscle within the neuromuscular system (Fig.  
355 5h).

356

### 357 **Circuits mediating early- and late-phase motor inhibition**

358 Previous studies in larvae identified several classes of segmental premotor interneurons  
359 whose optogenetic activation induces muscle relaxation, including the first-order  
360 premotor interneurons PMSI and iIN, and second-order premotor interneurons  
361 GDL<sup>5,24,25,46</sup>. Of these, GDL and iIN neurons are activated earlier than their target MNs  
362 and regulate the timing of muscular contraction rather than relaxation either via  
363 disinhibition (GDL) or by acting as a delay line (iIN). In contrast, PMSI neurons, like  
364 Canon, are activated later than their target MNs and regulate the duration of MN activities  
365 and speed of locomotion. Thus, PMSIs could potentially play roles in the regulation of  
366 muscle relaxation although this possibility has not been directly addressed.

367 PMSIs together with other inhibitory premotor interneurons are activated by the  
368 second-order premotor interneurons, lfb-Fwd and lfb-Bwd neurons, during forward and  
369 backward locomotion, respectively<sup>24</sup>. lfb-Fwd and lfb-Bwd neurons are active at a similar  
370 timing to MNs in the same neuromere and provide excitation to PMSIs and other shared  
371 downstream premotor interneurons in the adjacent neuromere behind the motor

372 propagation, which in turn provide inhibitory inputs to MNs innervating longitudinal  
373 muscles (L-MNs) and excitatory inputs to MNs innervating the antagonistic and later-  
374 activating transverse muscles (T-MNs, Fig. 7 and Supplementary Fig. 7a, b). Thus,  
375 during backward locomotion, timing of the activation of inhibitory premotor interneurons  
376 (and ensuing muscular relaxation) appears to be regulated via at least two pathways,  
377 one including lfb-Bwd neurons and providing activation at a relatively early phase (~1  
378 neuromere behind the wave front) and the other including Canon neurons and providing  
379 activation at a late phase (2-4 neuromeres behind the wave front; Fig. 7). It would be  
380 interesting to study in the future whether there exists a counterpart of Canon neurons  
381 during forward locomotion that mediates a late-phase inhibition.

382         Interestingly, lfb-Bwd and Canon neurons provide inputs to almost non-  
383 overlapping sets of inhibitory interneurons, suggesting that dedicated premotor  
384 interneurons mediate early- versus late-phase motor inhibition (Supplementary Fig. 7c).  
385 A31k is the only downstream inhibitory premotor neurons common to Canon and lfb-Bwd  
386 neurons. Activity of the A31k neuron lasts much longer than that of A02e (a PMSI) which  
387 is only innervated by lfb-Bwd neurons, consistent with the idea that lfb-Bwd and Canon  
388 neurons provides early- and late-excitation to this and other downstream neurons,  
389 respectively (Supplementary Fig. 7d-h).

390

### 391 **Possible roles of Canon neurons in the maintenance of relaxed state of** 392 **muscles**

393 Inhibition mediated by Canon neurons is not only later but also likely longer compared to  
394 that mediated by lfb-Bwd neurons, since the target premotor interneurons in each  
395 neuromere receive inputs from Canon neurons in two consecutive neuromeres. The long  
396 duration of Canon-mediated activation suggests that it is present even after MN activity



397 ceases. Thus, Canon-mediated late-phase inhibition may play roles not only in the  
398 process of muscular relaxation but also maintenance of the relaxed state after  
399 movement, which might be important to inhibit inappropriate contraction induced by self-  
400 generated sensory signals<sup>47</sup>. In *Drosophila* larvae, it is known that muscle contraction  
401 activates a group of proprioceptors, including the dorsal and ventral bipolar dendrite md  
402 neurons (dbd and vbd, respectively<sup>23,48</sup>), which provide direct and indirect excitatory  
403 outputs to MNs<sup>23</sup>. These proprioceptive signals could inappropriately activate MNs and  
404 induce muscle contraction behind the peristaltic wave. Canon neurons may suppress  
405 such inappropriate muscular contraction by providing prolonged inhibitory inputs to MNs.  
406 The results of the transient inhibition of GVLs, a strong downstream target of Canon  
407 neurons, are consistent with this idea. When GVLI activity was optogenetically inhibited  
408 during locomotion, the larvae immediately and strongly contracted their muscles in an  
409 abnormal fashion and ceased locomotion. One possibility is that MNs receive tonic or  
410 phasic excitatory inputs when not being recruited during locomotion, which would  
411 interfere with the execution of the locomotor waves and have to be continuously  
412 suppressed by inhibitory signals from GVLs. Interestingly, GVLs receive strong inputs  
413 not only from Canon neurons but also from proprioceptive sensory neurons, dbd and  
414 vbd. A02I, another second-order premotor interneuron downstream of Canon, also  
415 receive inputs from the dbd proprioceptor. Thus, GVLs and A02I neurons may regulate  
416 muscular relaxation by integrating signals from the central pattern generating circuits (via  
417 Canon neurons) and from proprioceptive feedback (via dbd and vbd, Fig. 5i).

418

## 419 **Canon-Canon network regulates its own intersegmentally propagating** 420 **activities**

421 Our results showed that Canon neurons regulate not only muscle relaxation but also their

422 own intersegmentally propagating activities. Segmentally repeated Canon neurons  
423 bidirectionally connect with each other by forming a bundle of axons (Fig. 6a-e). When  
424 synaptic transmission in the Canon-Canon network was inhibited, segmentally  
425 propagating activity of Canon neurons was often interrupted (Fig. 6f-i). It should be noted  
426 that in the absence of transmission by the Canon-Canon network, waves of muscle  
427 contraction propagated normally in all peristalses we observed (Supplementary Fig. 6).  
428 Thus, the Canon-Canon network constitutes a circuit specialized for generating the  
429 pattern of muscular relaxation. However, the activity of Canon neurons should also be  
430 under the influence of the earlier activating excitatory CPGs since Canon activities and  
431 muscle relaxation must occur in phase with contraction of muscles. Indeed, calcium  
432 imaging showed that propagating activity of Canon neurons is in phase with that of earlier  
433 activating MNs (Fig. 1c, d and Supplementary Fig. 1e). Thus, the Canon-Canon network  
434 appears to function as a sub-circuit or smaller pattern generating circuit that functions  
435 within a larger CPG, as proposed in other systems<sup>1,3</sup>.

436 Canon neurons are activated later than MNs in the same neuromere with a lag  
437 of one to two neuromeres (Fig. 1c, d and Supplementary Fig. 1e). In contrast to Canon  
438 neurons, the activities of lfb-Fwd and lfb-Bwd neurons, which also mediate motor  
439 inhibition, occur at a similar timing as MNs in the same neuromere and are likely under  
440 direct influence of the CPGs driving motor excitation. Delay appropriate for motor  
441 inhibition is realized in the lfb-Fwd and lfb-Bwd pathway by projecting an intersegmental  
442 axon in an opposite direction to the motor wave. Similarly, Canon neurons send  
443 intersegmental axons to connect with premotor neurons in neuromeres behind the motor  
444 wave, so as to activate the downstream neurons with a delay corresponding to one or  
445 two neuromeres compared to the wave front. However, to generate even longer delays  
446 in muscle relaxation, Canon neurons may have evolved to form a pattern generating

447 circuit which is capable of generating delayed propagating activities distinct from the  
448 excitatory activity propagation.

449         How the Canon-Canon network generates propagating waves of activity remains  
450 to be determined. We found that Canon neurons receive strong inputs from ThDNs  
451 neurons which in turn are activated by MDNs, command-like neurons for backward  
452 locomotion. The combination of these descending inputs, Canon-Canon signaling and  
453 some other signals from the excitatory CPGs may generate the delayed propagating  
454 activity for muscle relaxation. Further exploration of the connectome and circuit  
455 mechanisms underlying the delayed propagation will be important future goals. It will  
456 also be interesting to study if similar circuit motifs as the Canon-Canon network regulate  
457 the timing of muscle relaxation in other invertebrate and vertebrate systems. Prolonged  
458 muscle contraction and delayed relaxation, as observed in larval preparations with  
459 inhibited Canon function, is a common symptom found in various human movement  
460 disorders<sup>8-10</sup>. Further investigation of Canon-Canon network and related circuits in other  
461 species may shed new light on our understanding of the control of muscle relaxation in  
462 health and disease.

463

## 464 **Figure legends**

### 465 **Fig. 1 Activity and anatomy of Canon neurons.**

466 (a) (Left) A scheme of a larval body which is segmented into T1-3 and A1-9(top). A  
467 scheme of a dissected larva, body-wall muscles, and the CNS (bottom). A CNS is also  
468 segmented and MNs on located in each neuromere sends outputs to muscles located  
469 on corresponding segment. (Right) Larval peristaltic behavior is generated by the  
470 propagation of muscular contraction (red) and delayed relaxation (blue) (left) which are  
471 induced by propagation of activity of MNs (red) (right). (b) Canon neurons in A3-A5

472 neuromeres show propagating activity in the backward direction. (c) Simultaneous  
473 imaging of A3 Canon neuron (magenta) and A3-A5 aCC MNs (blue). Backward (bwd)  
474 and forward (fwd) fictive waves are indicated by arrows in (b, c). (d) Linear phase plot of  
475 activity peaks in an A3 Canon neuron (magenta) and A3-A5 aCC MNs (blue) during  
476 backward waves. Each of the two horizontal lines represents an individual preparation.  
477 The timing of the activity peaks in each neuron relative to the phase of backward  
478 peristalses were plotted. Phase 0 is initiation of activity of A2 Canon neuron, while Phase  
479 1 is peak of activity of A6 Canon neuron.  $n = 19$  waves from two larvae. (e, f) Morphology  
480 of single-cell clones of Canon neurons in A3 (top) and in A4 (bottom) obtained by MCFO.  
481 Dotted lines indicate segmental borders identified by the Fasciclin2 (Fas2)-positive TP1  
482 tract<sup>49</sup>. (e) Dorsal view, (f) Anterior view reconstructed from the region shown by a white  
483 box in (e). (g) A focal plane showing that presynaptic sites of Canon neurons visualized  
484 by the expression of a presynaptic marker Syt-GFP (green) are also positive for ChAT  
485 (magenta, arrows). Scale bars in (e, f), 50  $\mu\text{m}$ . Scale bar in (g), 5  $\mu\text{m}$ .

486

## 487 **Fig. 2 Activation of Canon neurons induces muscular relaxation.**

488 (a) Expression of CsChrimson driven by *R91C05-LexA*. Note that the expression is only  
489 seen in Canon neurons. (b) Time-lapse images (top) and stack images (bottom) of  
490 control (left, ATR-) and experimental (right, ATR+) larvae during optogenetic  
491 perturbation. The experimental larva stopped immediately with its body relaxed when  
492 exposed to red light. 0 sec indicates the onset of light stimulation. (c) Quantification of  
493 the number of forward peristalses during the first 2 seconds of light stimulation.  $n = 10$   
494 larvae in each group. Eight out of ten larvae in the experimental group halted with their  
495 muscles relaxed upon photo-stimulation, while no control larvae stopped locomotion.  
496  $**p = 4.29 \times 10^{-3} < 0.01$ , the two-sided Fisher exact test with the Holm method. Scale

497 bars, 50  $\mu\text{m}$  (a) and 1 mm (b).

498

499 **Fig. 3 Canon neurons are required for proper muscular relaxation during**  
500 **backward peristalses.**

501 (a) An image of body-wall muscles visualized by expression of *MhcGFP*, focusing on  
502 ventral muscles in segments A2-A3. The white solid line indicates the length of muscle  
503 6 and the white dotted line indicates the location used to make the kymographs shown  
504 in (b, c). (b, c) Kymographs showing movement of the ventral muscles in dissected  
505 control (Gal4 negative condition) (b) and *Canon-spGal4 > UAS-Kir* (c) larvae. Bars on  
506 the right side of each kymograph indicate the duration of backward (B) and forward  
507 peristalses (F), respectively. Note elongated duration of backward peristalses in the  
508 experimental animal. (d) Plots of muscular length (cyan line) and its time differential (blue  
509 line) during forward (top) and backward peristalses (bottom). Magenta and green points  
510 indicate the time point when relaxation (magenta) and contraction (green) speed is  
511 maximum, respectively. (e-h) Comparison of the maximum muscular relaxation (e, f) and  
512 contraction (g, h) speed during forward and backward peristalses. (i, j) Comparison of  
513 duration of muscular contraction during forward (i) and backward (j) peristalses.  $n = 25$   
514 forward and 28 backward peristalses in three control larvae and 46 forward and 15  
515 backward peristalses in three experimental larvae. \*\*\*\* $p = 1.42 \times 10^{-7} < 0.0001$  (f),  
516 \*\*\*\* $p = 4.32 \times 10^{-5} < 0.0001$  (h), \*\* $p = 2.70 \times 10^{-3} < 0.01$  (j), n.s.; not significant:  $p >$   
517 0.05, the two-sided Mann-Whitney U test. Scale bars in (a, b), 500  $\mu\text{m}$ .

518

519 **Fig. 4 Upstream circuits of Canon neurons.**

520 (a) EM reconstructed of Canon neurons in neuromeres A2 and A3. (b) A bar graph of  
521 postsynaptic occupation of A2-A3 Canon neurons. Major partners (occupying more than

522 5 % of total postsynapses) are shown. (c) An EM image showing synapses between  
523 ThDN neuron (presynapse, orange) and A2 Canon neuron (postsynapse, light blue).  
524 White arrows indicate T-bars. (d, e) Dorsal (d) and anterior view (e) of reconstruction  
525 images of ThDNs (orange) and A2 Canon (blue) neurons. Triangles indicate the midline.  
526 (f) A diagram of connectivity from MDN to Canon neurons. Arrows with filled heads  
527 indicate cholinergic synapses while arrows with empty heads indicate synapses with  
528 unidentified neurotransmitter. The bar indicates inhibitory outputs. Numbers next to the  
529 lines show the number of synapses. Scale bar (c), 50 nm.

530

### 531 **Fig. 5 Downstream circuits of Canon neurons.**

532 (a) A bar graph showing presynaptic occupation of A2-A3 Canon neurons. Major partners  
533 (occupying more than 2.5 % of total presynapses) are shown. (b, c) Dorsal view (b) and  
534 anterior view (c) of EM reconstructed A06c and Canon neurons. (d, e) Dorsal (d) and  
535 anterior (e) view of reconstruction images of GVLI and Canon neurons. (f, g) EM images  
536 showing synapses between Canon (cyan) and A06c (f, magenta) or GVLI (g, purple)  
537 neurons. White arrows indicate T-bars. (h) A circuit diagram from Canon neurons to  
538 muscles. Grey dotted lines indicate boundaries of neuromeres. Arrows with triangle  
539 heads indicate excitatory synaptic connections, lines with bar heads inhibitory synaptic  
540 connections and those with diamond-shaped heads glutamatergic synapses. (i) GVLI  
541 and A02I neurons receive inputs from Canon neurons and proprioceptors. (j) Optogenetic  
542 inactivation of GVLI neurons in a *R26A08-Gal4 > GtACR1* larva induces rapid muscular  
543 contraction. 0.0 sec indicates onset of stimulation.  $n = 10$  larvae in both control (ATR  
544 negative condition) and experimental groups. Nine out of ten experimental larvae  
545 showed rapid abdominal contraction upon photo-stimulation, while all control larvae were  
546 unaffected. Scale bars (f, g), 500 nm.

547

548 **Fig. 6 Canon-Canon network regulates its own wave-like activity.**

549 (a, b) EM reconstructed Canon neurons in A2 and A3. Note that these neurons form a  
550 bundle of ascending axons. Dorsal (a) and anterior (b) view. (c, d) EM images showing  
551 bidirectional synapses between Canon neurons. White arrows indicate T-bars. (e, f)  
552 Schemes of Canon-Canon networks in control (e) and *Canon > TeTxLC* (f) larvae. Canon  
553 neurons connect with each other via synapses present in their ascending axons. TeTxLC  
554 disrupts Canon-Canon transmission but leaves input from other upstream neurons intact.  
555 (g, h) Activity propagation among Canon neurons in control (g) and *Canon > TeTxLC* (h)  
556 larvae. Arrows with solid lines indicate complete waves, while those with dotted lines  
557 indicate incomplete waves. (i) A cross table showing the number of complete and  
558 incomplete waves in the control (-TeTxLC) and *Canon > TeTxLC* (+TeTxLC) larvae. The  
559 number of incomplete waves is significantly increased in the experimental group.  $n = 19$   
560 waves in four control larvae and 27 waves in seven experimental larvae. \*\*\*  $p =$   
561  $3.56 \times 10^{-4} < 0.001$ , chi-squared test. Scale bars (c, d) indicate 500 nm.

562

563 **Fig. 7 A model of early- and late-phase motor inhibition mediated by lfb-B**  
564 **and Canon neurons during backward locomotion.**

565 When the wave front reaches the segment (n), lfb-Bwd neurons in segment (n) and  
566 Canon neurons in segment (n-1) and segment (n-2) are activated. lfb-Bwd and Canon  
567 neurons in turn activate inhibitory premotor neurons (inPMN) innervating L-MNs in  
568 segment (n-1) and in segments (n-2) to (n-4), respectively, via their ascending axons.  
569 lfb-Bwd neuron activates excitatory premotor neurons (ePMN) that innervate T-MNs.  
570 Neurons outlined by dotted or solid lines indicate inactive or active neurons, respectively.  
571 Arrows with filled heads indicate excitatory synapses while those with bar heads indicate

572 inhibitory outputs.

573

## 574 **Methods**

### 575 ***Drosophila melanogaster* strains**

576 Third-instar larvae of the following fly strains were used for all functional and histological  
577 experiments. *y<sup>1</sup> w<sup>1118</sup>* (Bloomington *Drosophila* Stock Center (BDSC), #6598), *R91C05-Gal4*  
578 (BDSC, #40578), *R26A08-Gal4<sup>39</sup>* (BDSC, #49153), *RRa-Gal4<sup>50</sup>* (gift from Dr. Miki Fujioka), *UAS-*  
579 *GCaMP6s<sup>51</sup>* (BDSC, #42746), *UAS-CD4::GCaMP6f<sup>24</sup>*, *UAS-TeTxLC<sup>42</sup>* (BDSC, #28838), *UAS-*  
580 *Kir2.1::EGFP<sup>33</sup>* (BDSC, #6596), *UAS-GtACR1<sup>36,41</sup>* (gift from Dr. Chris Doe), *UAS-CD4::tdGFP<sup>52</sup>*  
581 (BDSC, #35836), *UAS-DenMark*, *UAS-syt::GFP/CyO*; *D/TM6C (UAS-TLN-21)<sup>30</sup>* (gift from Dr.  
582 Bassem A. Hassan), *MCFO4<sup>29</sup>* (BDSC, #64087), *MCFO6<sup>29</sup>* (BDSC, #64090), *R91C05-LexA*  
583 (BDSC, #61629), *LexAop-CsChrimson::mVenus<sup>32</sup>*, (BDSC, #55136), *sybGRASP (lexAop-nSyb-*  
584 *spGFP1-10, UAS-CD4-spGFP11)<sup>53</sup>* (BDSC, #64315), *MhcGFP<sup>34</sup>* (gift from Dr. Cynthia L.  
585 Hughes), *Canon-spGal4* (A combination of *R91C05-Gal4.AD* (BDSC, #70979) and *VT019059-*  
586 *Gal4.DBD* (BDSC, #71731)), *MB120B-spGal4<sup>20</sup>*, *A06c-Gal4* (A combination of *R24A05-Gal4*  
587 (BDSC, #49055) and *Cha3.3kbp-Gal80<sup>54</sup>* (gift from Dr. Toshihiro Kitamoto))

588

### 589 **Calcium imaging**

590 The larvae were dissected and their CNSs were isolated and placed on a MAS-coated slide glass  
591 (S9215, Matsunami Glass, Japan) in TES buffer (TES 5 mmol, NaCl 135 mmol, KCl 5 mmol,  
592 CaCl<sub>2</sub> 2 mmol, MgCl<sub>2</sub> 4 mmol, Sucrose 36 mmol). The imaging was conducted with an EMCCD  
593 camera (iXon, ANDOR TECHNOLOGY, UK) mounted on an upright microscope (Axioskop2 FS,  
594 Zeiss, Germany) equipped with a spinning-disk confocal unit (CSU21, Yokogawa, Japan) and a  
595 20X water immersion objective lens (UMPlanFLN 20XW, Olympus, Japan). In experiments with  
596 GCaMP6s or GCaMP6f, 488 nm blue light (CSU-LS2WF, Solution Systems, Japan) with an  
597 intensity of 4.5 μW/mm<sup>2</sup> was used. The light intensity was measured by the laser power meter  
598 (LP1, Sanwa Electric Instrument, Japan). Exposure time and frequency (frames per second, fps)



599 were 99.1 ms and 10 fps for imaging of Canon neurons (Fig. 1b and 6g, h), 50 ms and 6 fps for  
600 simultaneous imaging of aCC MNs and Canon neurons (Fig. 1c, d, and Supplementary Fig. 1e),  
601 and 85 ms and 5fps for simultaneous imaging of aCC MNs and GVLIs (Supplementary Fig. 4f).  
602 To rapidly acquire images from two focal planes each containing aCC MNs and Canon neurons  
603 or aCC MNS and GVLIs, a piezo unit (P-725, Physik Instrumente, Germany) controlled by a piezo  
604 Z controller (E-665 Piezo Amplifier/Servo Controller, Physik Instrumente, Germany) and a precise  
605 control unit (ER-PCUA-100, ANDOR TECHNOLOGY, UK) was used.

606 The regions of interest (ROIs) were set to surround the axons or cell bodies of the target  
607 neurons. Signal intensity in each frame was defined as the maximum or mean signal value among  
608 all pixels within each ROI. After extraction of raw signal data, a Savitzky-Golay filter was applied  
609 to the raw data to remove noise and perform smoothing. The calcium signals were normalized by  
610 the baseline intensity as follows,

611

$$612 \quad \frac{\Delta F}{F} = \frac{F_{ROI[n]}(t) - Fb_{ROI[n]}(t)}{Fb_{ROI[n]}(t)}$$

613

614 where  $n$  designates the ROI identity,  $t$  the frame number,  $F_{ROI[n]}(t)$  the signal intensity at  $t$ , and  
615  $Fb_{ROI[n]}(t)$  baseline intensity defined as the minimum  $F_{ROI[n]}(t)$  between  $t$  to  $t + 100$ . In order to  
616 focus on and visualize the neural activity timing of A02e and A31k (Supplementary Fig. 7f, g), the  
617 signal of each neuron,  $\frac{\Delta F}{F}$ , was normalized at its maximum value to obtain the normalized signal,

$$618 \quad \frac{\Delta F}{F_{norm}}$$

### 619 **Analysis of phase lag during fictive locomotion**

620 To evaluate the time lag between the activity of aCC MNs and Canon neurons (Fig. 1d, and  
621 Supplementary Fig. 1e), we focused on the initiation and peak of the rise in calcium signals in  
622 each fictive backward locomotion. The initiation was defined as the time when a rise in fluorescent  
623 started before the peak. For the analysis of activity timing of Canon and aCC MNs (Fig. 1d), peak  
624 time for neuron  $X$  ( $X =$

625  $\{aCCA2, aCCA3, aCCA4, aCCA5, aCCA6, CanonA3, CanonA4, CanonA5\}$ ,  $t_{P_X}$ , was normalized to the  
626 duration of wave propagation from A2 to A6 aCC MNs to give  $t_{P_{Xnorm}}$  as follows.

627

$$628 \quad t_{P_{Xnorm}} = \frac{t_{P_X} - t_{P_{aCCA2}}}{t_{P_{aCCA6}} - t_{P_{aCCA2}}}$$

629

630 For the analysis of activity duration of Canon and aCC neurons (Supplementary Fig. 1e), initiation  
631 time ( $t_{I_X}$ ) for neuron  $X$  was also normalized to give  $t_{I_{Xnorm}}$  as follow.

632

$$633 \quad t_{I_{Xnorm}} = \frac{t_{I_X} - t_{I_{aCCA2}}}{t_{P_{aCCA6}} - t_{I_{aCCA2}}}$$

634 For the analysis of activity duration of A31k and A02e (Supplementary Fig. 7h), we used the data  
635 obtained in a previous research<sup>24</sup>, in which GCaMP6f signals of A31k and A02e were recorded  
636 simultaneously with RGECO1 signals of A02e as a reference. Here normalized activity duration  
637 of A02e or A31k recorded with GCaMP6f located in A3 neuromere,  $\tau_X$ , is defined by the following  
638 equation.

639

$$640 \quad \tau_X = \frac{t_{P_X} - t_{I_X}}{t_{P_{A02eRGECO1}} - t_{I_{A02eRGECO1}}}$$

641

## 642 **Immunohistochemistry**

643 The larvae were pinned on a silicon-filled dish and dissected in TES buffered saline. After  
644 dissection, the larvae were rinsed with phosphate buffered saline (PBS) and fixed in 4 %  
645 paraformaldehyde in PBS for 30 min at room temperature. After a 30 min rinse with 0.2 % Triton  
646 X-100 in PBS (PBT), the larvae were incubated with 5 % normal goat serum (NGS) in PBT for 30  
647 min. Then the larvae were incubated for at least 18 hours at 4 °C with the primary antibodies  
648 mixed in with 5 % NGS in PBT. After a 30 min rinse, the larvae were incubated at 4 °C with the  
649 secondary antibodies mixed in with 5 % NGS in PBT for at least 12 hours. Fluorescent images

650 were scanned and acquired using a confocal microscope (FV1000, Olympus, Japan) with a 20X  
651 water immersion objective lens (UMPlanFLN 20XW, Olympus, Japan) or a 100X water immersion  
652 objective lens (LUMPlanFI 100XW, Olympus, Japan). Antibodies: rabbit anti-GFP (Af2020,  
653 Frontier Institute; 1:1000; RRID: AB 2571573), guinea pig anti-GFP (Af1180, Frontier Institute;  
654 1:1000; RRID: AB 2571575), mouse anti-FasII (1D4, Hybridoma Bank (University of Iowa); 1:10;  
655 RRID: AB 528235), rabbit anti-HA (C29F4, Cell Signaling Technology; 1:300; RRID: AB 1549585),  
656 rat anti-FLAG (NBP1-06712, Novus Biologicals; 1:200; RRID: AB 1625981), mouse anti-ChAT  
657 (4B1, Hybridoma Bank (University of Iowa); 1:50; RRID: AB 528122), rabbit anti-GABA (A2052,  
658 Sigma; 1:100; RRID: AB 477652), rabbit anti-vGluT (Gift from Dr. Hermann Aberle; 1:1000; RRID:  
659 AB 2315544), mouse anti-Brunchpilot (Brp) (nc82, Hybridoma Bank (University of Iowa); 1:50;  
660 RRID: AB 2314866), goat Alexa Fluor 488 anti-rabbit (A11034, Thermo Fisher Scientific; 1:300;  
661 RRID AB 2576217), goat Cy3 anti-rabbit (A10520, Thermo Fisher Scientific; 1:300; RRID: AB  
662 10563288), goat Cy5 anti-rabbit (A10523, Thermo Fisher Scientific; 1:300; RRID: AB 2534032),  
663 goat Alexa Fluor 555 anti-mouse (A21424, Thermo Fisher Scientific; 1:300; RRID: AB 141780),  
664 goat Cy5 anti-mouse (A10524, Thermo Fisher Scientific; 1:300; RRID: AB 2534033), goat Alexa  
665 Fluor 633 anti-rat (A21094, Thermo Fisher Scientific; 1:300; RRID: AB 141553), goat Alexa Fluor  
666 488 anti-guinea pig (A11073, Thermo Fisher Scientific; 1:300; RRID: AB 2534117), goat Alexa  
667 Fluor 647 anti-Horseradish Peroxidase (HRP) (123-605-021, Jackson ImmunoResearch; 1:200;  
668 RRID: AB 2338967)

669

## 670 **Optogenetics in behaving larvae**

671 In this study, CsChrimson<sup>32</sup> and GtACR1<sup>41</sup> was used for optogenetical activation and inactivation  
672 of neurons, respectively. The larvae were grown at 25 °C in vials with food, either containing 1  
673 mmol of all-trans retinal (ATR) or none. The vials were covered with aluminum foil. Third instar  
674 larvae were gathered and washed to remove extraneous matter. Each behavior assay was  
675 conducted on an agar plate under shaded conditions. The surface temperature was adjusted at  
676 25 °C ±1 °C by a heating plate and the room temperature was also set at 25 °C ±1 °C. For

677 optogenetic activation with CsChrimson, red LED light (660 nm LED, THORLABS, USA) was  
678 applied with an intensity of 250  $\mu\text{W}/\text{mm}^2$  while larvae were performing sequential forward  
679 locomotion. For optogenetic inhibition with GtACR1, green light (530-550 nm) from a lamp (X-  
680 Cite, Olympus, Japan) with RFP1 filter was applied with an intensity of 1  $\text{mW}/\text{mm}^2$ . The light  
681 intensity was measured using a laser power meter (LP1, Sanwa Electric Instrument, Japan). Trials  
682 with a duration of five seconds were applied once for each animal. The intensity of the background  
683 illumination was set as low as possible so as not to activate CsChrimson or GtACR1. A CCD  
684 camera (XCD-V60, SONY, Japan) under a stereo-microscope (SZX16, Olympus, Japan) was  
685 used for recording larval behavior. For quantification with CsChrimson, we counted the number  
686 of forward peristalses performed in the first two seconds after light stimulation onset in each trial.  
687

## 688 **Imaging and quantification of muscular movements**

689 The larvae were pinned on a silicon-filled dish and dissected along the dorsal side in TES buffered  
690 saline then the larval internal tissues were removed. In the experiment with Kir (Fig. 3 and  
691 Supplementary Fig. 2c, d), a lamp (X-Cite, Olympus, Japan) was used as a light source to  
692 illuminate the muscles at a light density of 7  $\mu\text{W}/\text{mm}^2$ . To quantitate muscular contraction and  
693 relaxation, we manually measured the length of muscle 6 in segment A3,  $L_{raw}(t)$ , in each frame  
694 during the recordings, using an annotation tool we developed that records the xy coordinate of a  
695 point clicked in a frame and calculates the distance between clicked points. The Savitzky-Golay  
696 filter was applied to the data to remove noise. We designated the frame number by  $t$  and muscular  
697 length by a function of  $t$ ,  $L(t)$ .  $L(\tau)$  was provided as a value of  $t = \tau$  of an approximate curve  
698 approximated to the data of  $L_{raw}(t)$  within range  $[\tau - 10, \tau + 10]$ .  $L(t)$  was differentiable and we  
699 defined the maximum relaxation speed (Fig. 3e, f) as the maximum time differential of  $L(t)$  during  
700 muscle relaxation and maximum contraction speed (Fig. 3g, h) as the absolute value of the  
701 minimum time differential of  $L(t)$  during muscle contraction. The duration of muscular contraction  
702 (Fig. 3i, j) was defined as the period from initiation of contraction to termination of relaxation.  
703

## 704 **EM reconstruction using CATMAID**

705 Acquisition and analysis of ssTEM data are described in previous researches<sup>26,37,46</sup>. We manually  
706 traced axons, dendrites, presynaptic sites (identified by the presence of a T-bar) and postsynaptic  
707 sites of Canon and other neurons using CATMAID<sup>35</sup> (annotated in CATMAID as "A18g").

708

## 709 **Analysis of activity propagation in Canon-Canon network**

710 To evaluate the effect of TeTxLC expressed in Canon neurons on their activity propagation, we  
711 defined “complete” and “incomplete” peristalses waves as follows. A complete wave was defined  
712 as a wave in which Canon activities in all neuromeres examined were high ( $\frac{\Delta F}{F}$  in each neuron at  
713 the peak is more than half of the maximum value of  $\frac{\Delta F}{F}$  during the recording). An incomplete wave  
714 was defined as a wave in which more than one Canon neuron showed low-level neural activity  
715 ( $\frac{\Delta F}{F}$  at the peak is less than half of the maximum value of  $\frac{\Delta F}{F}$ ).

716

## 717 **Statistical Analysis**

718 The two-sided Mann-Whitney U test, the two-sided Fisher's exact test, or Chi-squared test were  
719 used to determine statistical significance as indicated in Figure legends. In multiple comparisons,  
720 the Holm method was used to avoid the family-wise error. The sample sizes are indicated within  
721 the respective figure as "n".

722 All statistical tests and quantification were performed using Python3.

723

## 724 **References**

- 725 1. Pearson, K. G. Common Principles of Invertebrates. *Annu. Rev. Neurosci.* **16**, 265–97  
726 (1993).
- 727 2. Marder, E. & Calabrese, R. L. Principles of rhythmic motor pattern generation. *Physiol.*  
728 *Rev.* **76**, 687–717 (1996).
- 729 3. Grillner, S. Neurobiological bases of rhythmic motor acts in vertebrates. *Science (80- )*.

- 730           **228**, 143–149 (1985).
- 731    4.    Gowda, S. B. M. *et al.* GABAergic inhibition of leg motoneurons is required for normal  
732           walking behavior in freely moving *Drosophila*. *Proc. Natl. Acad. Sci. U. S. A.* **115**, E2115–  
733           E2124 (2018).
- 734    5.    Kohsaka, H., Takasu, E., Morimoto, T. & Nose, A. A group of segmental premotor  
735           interneurons regulates the speed of axial locomotion in *drosophila* larvae. *Curr. Biol.* **24**,  
736           2632–2642 (2014).
- 737    6.    Goulding, M., Bourane, S., Garcia-Campmany, L., Dalet, A. & Koch, S. Inhibition  
738           downunder: an update from the spinal cord. *Curr. Opin. Neurobiol.* **26**, 161–166 (2014).
- 739    7.    Britz, O. *et al.* A genetically defined asymmetry underlies the inhibitory control of flexor–  
740           extensor locomotor movements. *Elife* **4**, 1–22 (2015).
- 741    8.    Kato, K., Vogt, T. & Kanosue, K. Brain Activity Underlying Muscle Relaxation. *Front.*  
742           *Physiol.* **10**, (2019).
- 743    9.    Grasso, M., Mazzini, L. & Schieppati, M. Muscle relaxation in Parkinson’s disease: A  
744           reaction time study. *Mov. Disord.* **11**, 411–420 (1996).
- 745    10.   Machuca-Tzili, L., Brook, D. & Hilton-Jones, D. Clinical and molecular aspects of the  
746           myotonic dystrophies: A review. *Muscle and Nerve* **32**, 1–18 (2005).
- 747    11.   Wiens, T. J. & Wolf, H. The inhibitory motoneurons of crayfish thoracic limbs: Identification,  
748           structures, and homology with insect common inhibitors. *J. Comp. Neurol.* **336**, 261–278  
749           (1993).
- 750    12.   Bräunig, P., Schmah, M. & Wolf, H. Common and specific inhibitory motor neurons  
751           innervate the intersegmental muscles in the locust thorax. *J. Exp. Biol.* **209**, 1827–1836  
752           (2006).
- 753    13.   Gao, S. & Zhen, M. Action potentials drive body wall muscle contractions in  
754           *Caenorhabditis elegans*. *Proc. Natl. Acad. Sci. U. S. A.* **108**, 2557–2562 (2011).
- 755    14.   Grillner, S. & Jessell, T. M. Measured motion: searching for simplicity in spinal locomotor  
756           networks. *Curr. Opin. Neurobiol.* **19**, 572–586 (2009).

- 757 15. Kiehn, O. Decoding the organization of spinal circuits that control locomotion. *Nat. Rev.*  
758 *Neurosci.* **17**, 224–238 (2016).
- 759 16. Kohsaka, H., Guertin, P. A. & Nose, A. Neural Circuits Underlying Fly Larval Locomotion.  
760 *Curr. Pharm. Des.* **23**, 1722–1733 (2017).
- 761 17. Clark, M. Q., Zarin, A. A., Carreira-Rosario, A. & Doe, C. Q. Neural circuits driving larval  
762 locomotion in *Drosophila*. *Neural Dev.* **13**, 1–10 (2018).
- 763 18. Kohsaka, H., Okusawa, S., Itakura, Y., Fushiki, A. & Nose, A. Development of larval motor  
764 circuits in *Drosophila*. *Dev. Growth Differ.* **54**, 408–419 (2012).
- 765 19. Xiang, Y. *et al.* Light-avoidance-mediating photoreceptors tile the *Drosophila* larval body  
766 wall. *Nature* **468**, 921–926 (2010).
- 767 20. Takagi, S. *et al.* Divergent Connectivity of Homologous Command-like Neurons Mediates  
768 Segment-Specific Touch Responses in *Drosophila*. *Neuron* **96**, 1373-1387.e6 (2017).
- 769 21. Heckscher, E. S., Lockery, S. R. & Doe, C. Q. Characterization of *Drosophila* larval  
770 crawling at the level of organism, segment, and somatic body wall musculature. *J.*  
771 *Neurosci.* **32**, 12460–12471 (2012).
- 772 22. Gjorgjieva, J., Berni, J., Evers, J. F. & Eglon, S. J. Neural circuits for peristaltic wave  
773 propagation in crawling *Drosophila* larvae: analysis and modeling. *Front. Comput.*  
774 *Neurosci.* **7**, 1–19 (2013).
- 775 23. Heckscher, E. S. *et al.* Even-Skipped+ Interneurons Are Core Components of a  
776 Sensorimotor Circuit that Maintains Left-Right Symmetric Muscle Contraction Amplitude.  
777 *Neuron* **88**, 314–329 (2015).
- 778 24. Kohsaka, H. *et al.* Regulation of forward and backward locomotion through intersegmental  
779 feedback circuits in *Drosophila* larvae. *Nat. Commun.* **10**, 1–11 (2019).
- 780 25. Fushiki, A. *et al.* A circuit mechanism for the propagation of waves of muscle contraction  
781 in *Drosophila*. *Elife* **5**, 1–23 (2016).
- 782 26. Ohyama, T. *et al.* A multilevel multimodal circuit enhances action selection in *Drosophila*.  
783 *Nature* **520**, 633–639 (2015).

- 784 27. Pulver, S. R. *et al.* Imaging fictive locomotor patterns in larval *Drosophila*. *J. Neurophysiol.*  
785 **114**, 2564–2577 (2015).
- 786 28. Park, J., Kondo, S., Tanimoto, H., Kohsaka, H. & Nose, A. Data-driven analysis of motor  
787 activity implicates 5-HT2A neurons in backward locomotion of larval *Drosophila*. *Sci. Rep.*  
788 **8**, 10307 (2018).
- 789 29. Nern, A., Pfeiffer, B. D. & Rubin, G. M. Optimized tools for multicolor stochastic labeling  
790 reveal diverse stereotyped cell arrangements in the fly visual system. *Proc. Natl. Acad.*  
791 *Sci. U. S. A.* **112**, E2967–E2976 (2015).
- 792 30. Nicolai, L. J. J. *et al.* Genetically encoded dendritic marker sheds light on neuronal  
793 connectivity in *Drosophila*. *Proc. Natl. Acad. Sci. U. S. A.* **107**, 20553–20558 (2010).
- 794 31. Mahr, A. & Aberle, H. The expression pattern of the *Drosophila* vesicular glutamate  
795 transporter: A marker protein for motoneurons and glutamatergic centers in the brain.  
796 *Gene Expr. Patterns* **6**, 299–309 (2006).
- 797 32. Klapoetke, N. C. *et al.* Independent optical excitation of distinct neural populations. *Nat.*  
798 *Methods* **11**, 338–346 (2014).
- 799 33. R. C. Hardie, P. R. Calcium influx via TRP channels is required to maintain PIP. *Neuron*  
800 **30**, 149–59 (2001).
- 801 34. Hughes, C. L. & Thomas, J. B. A sensory feedback circuit coordinates muscle activity in  
802 *Drosophila*. *Mol. Cell. Neurosci.* **35**, 383–396 (2007).
- 803 35. Saalfeld, S., Cardona, A., Hartenstein, V. & Tomančák, P. CATMAID: Collaborative  
804 annotation toolkit for massive amounts of image data. *Bioinformatics* **25**, 1984–1986  
805 (2009).
- 806 36. Carreira-Rosario, A. *et al.* MDN brain descending neurons coordinately activate backward  
807 and inhibit forward locomotion. *Elife* **7**, (2018).
- 808 37. Schneider-Mizell, C. M. *et al.* Quantitative neuroanatomy for connectomics in *Drosophila*.  
809 *Elife* **5**, 1–36 (2016).
- 810 38. Zarin, A. A., Mark, B., Cardona, A., Litwin-Kumar, A. & Doe, C. Q. A multilayer circuit



- 811 architecture for the generation of distinct locomotor behaviors in *Drosophila*. *Elife* **8**, 1–34  
812 (2019).
- 813 39. Itakura, Y. *et al.* Identification of inhibitory premotor interneurons activated at a late phase  
814 in a motor cycle during *drosophila* larval locomotion. *PLoS One* **10**, 1–24 (2015).
- 815 40. Sales, E. C., Heckman, E. L., Warren, T. L. & Doe, C. Q. Regulation of subcellular dendritic  
816 synapse specificity by axon guidance cues. *Elife* **8**, (2019).
- 817 41. Mohammad, F. *et al.* Optogenetic inhibition of behavior with anion channelrhodopsins. *Nat.*  
818 *Methods* **14**, 271–274 (2017).
- 819 42. Sweeney, S. T., Broadie, K., Keane, J., Niemann, H. & O’Kane, C. J. Targeted expression  
820 of tetanus toxin light chain in *Drosophila* specifically eliminates synaptic transmission and  
821 causes behavioral defects. *Neuron* **14**, 341–351 (1995).
- 822 43. Wolf, H. Activity patterns of inhibitory motoneurons and their impact on leg movement in  
823 tethered walking locusts. *J. Exp. Biol.* **152**, 281–304 (1990).
- 824 44. Thapliyal, S. & Babu, K. C. *elegans* locomotion: Finding balance in imbalance. in  
825 *Advances in Experimental Medicine and Biology* (2018). doi:10.1007/978-981-13-3065-  
826 0\_14.
- 827 45. Landgraf, M., Bossing, T., Technau, G. M. & Bate, M. The origin, location, and projections  
828 of the embryonic abdominal motorneurons of *Drosophila*. *J. Neurosci.* **17**, 9642–9655  
829 (1997).
- 830 46. Zwart, M. F. *et al.* Selective Inhibition Mediates the Sequential Recruitment of Motor Pools.  
831 *Neuron* **91**, 615–628 (2016).
- 832 47. Crapse, T. B. & Sommer, M. A. Corollary discharge across the animal kingdom. *Nat. Rev.*  
833 *Neurosci.* **9**, 587–600 (2008).
- 834 48. Vaadia, R. D. *et al.* Characterization of Proprioceptive System Dynamics in Behaving  
835 *Drosophila* Larvae Using High-Speed Volumetric Microscopy. *Curr. Biol.* **29**, 935-944.e4  
836 (2019).
- 837 49. Landgraf, M., Sánchez-Soriano, N., Technau, G. M., Urban, J. & Prokop, A. Charting the

- 838            *Drosophila* neuropile: A strategy for the standardised characterisation of genetically  
839            amenable neurites. *Dev. Biol.* **260**, 207–225 (2003).
- 840    50.    Fujioka, M. Even-skipped, acting as a repressor, regulates axonal projections in  
841            *Drosophila*. *Development* **130**, 5385–5400 (2003).
- 842    51.    Chen, T. W. *et al.* Ultrasensitive fluorescent proteins for imaging neuronal activity. *Nature*  
843            **499**, 295–300 (2013).
- 844    52.    Han, C., Jan, L. Y. & Jan, Y. N. Enhancer-driven membrane markers for analysis of  
845            nonautonomous mechanisms reveal neuron-glia interactions in *Drosophila*. *Proc. Natl.*  
846            *Acad. Sci. U. S. A.* **108**, 9673–9678 (2011).
- 847    53.    Macpherson, L. J. *et al.* Dynamic labelling of neural connections in multiple colours by  
848            trans-synaptic fluorescence complementation. *Nat. Commun.* **6**, 1–9 (2015).
- 849    54.    Kitamoto, T. Conditional disruption of synaptic transmission induces male-male courtship  
850            behavior in *Drosophila*. *Proc. Natl. Acad. Sci. U. S. A.* **99**, 13232–13237 (2002).
- 851

**Fig. 1**

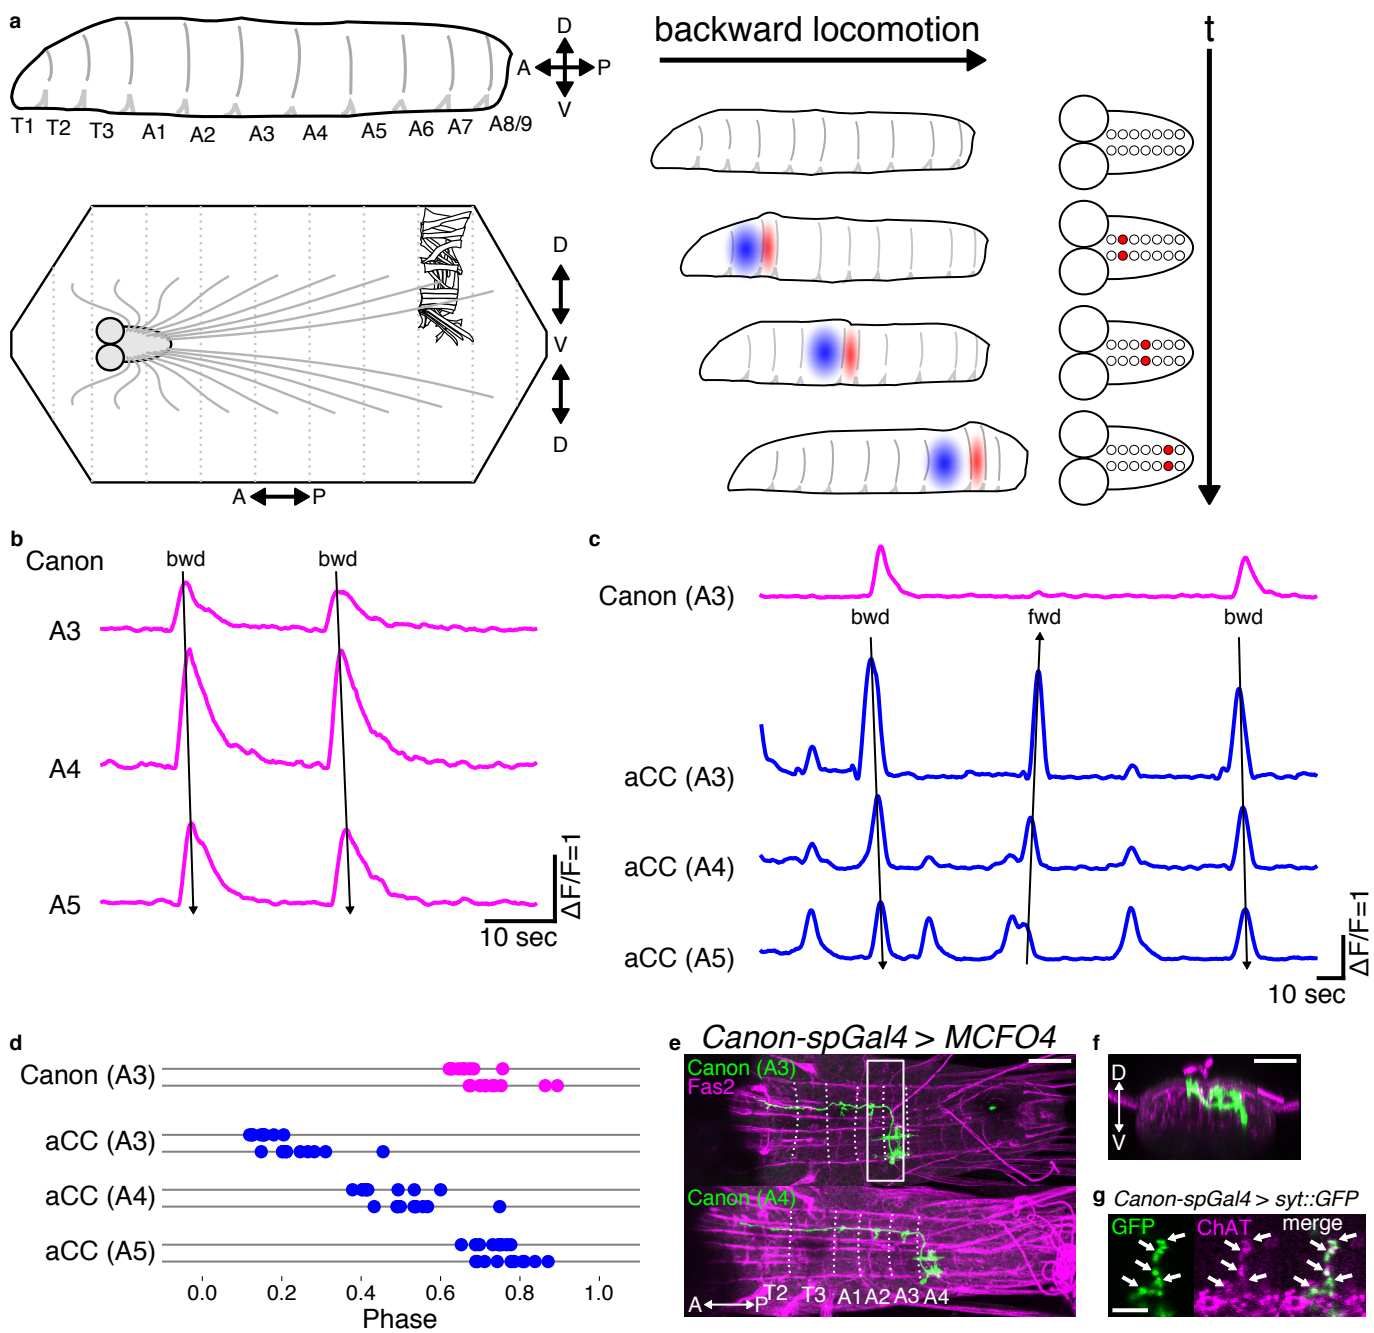

Fig. 2

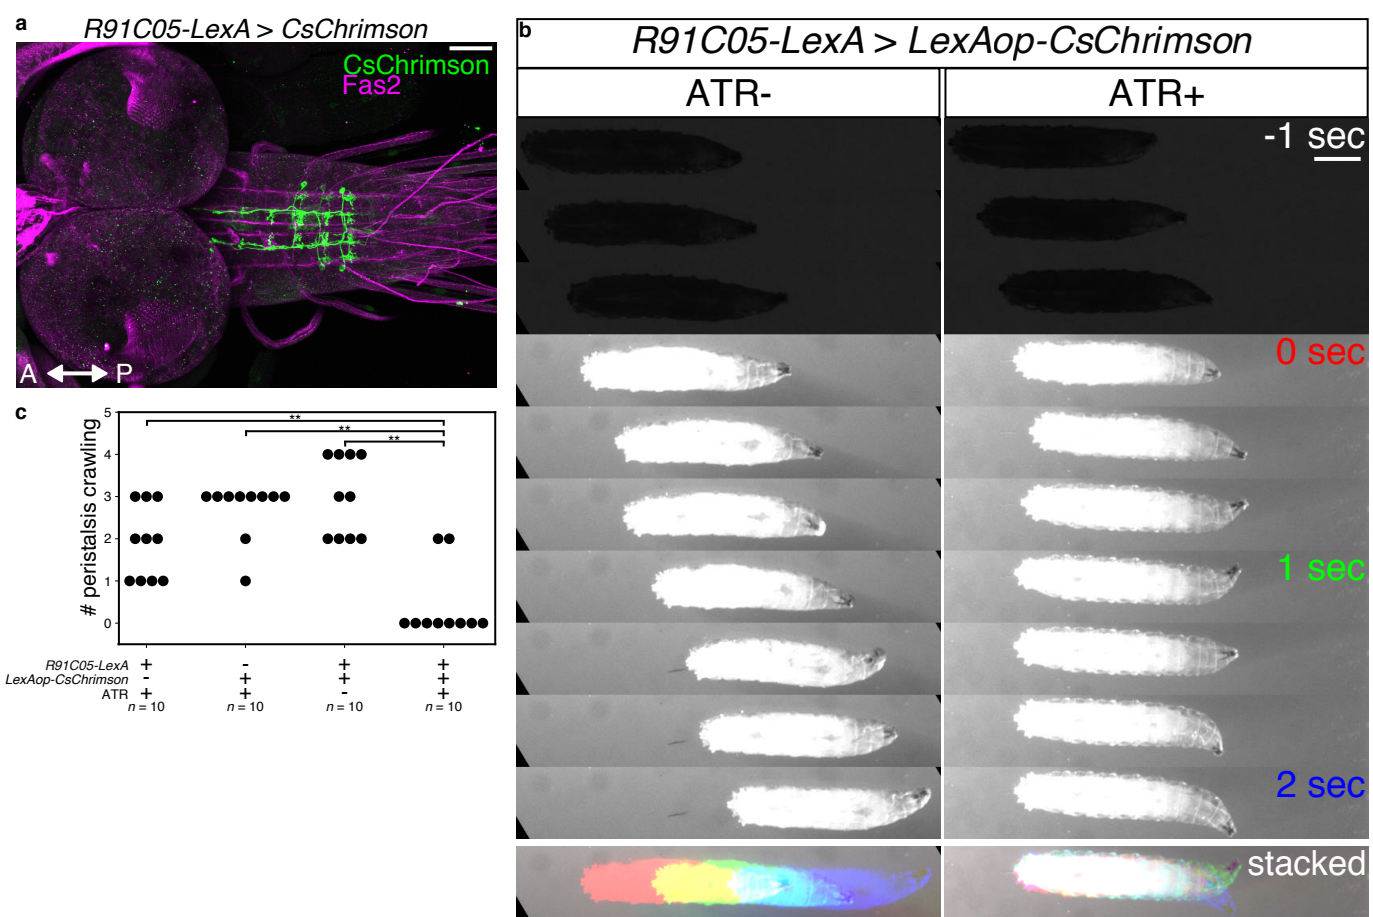

Fig. 3

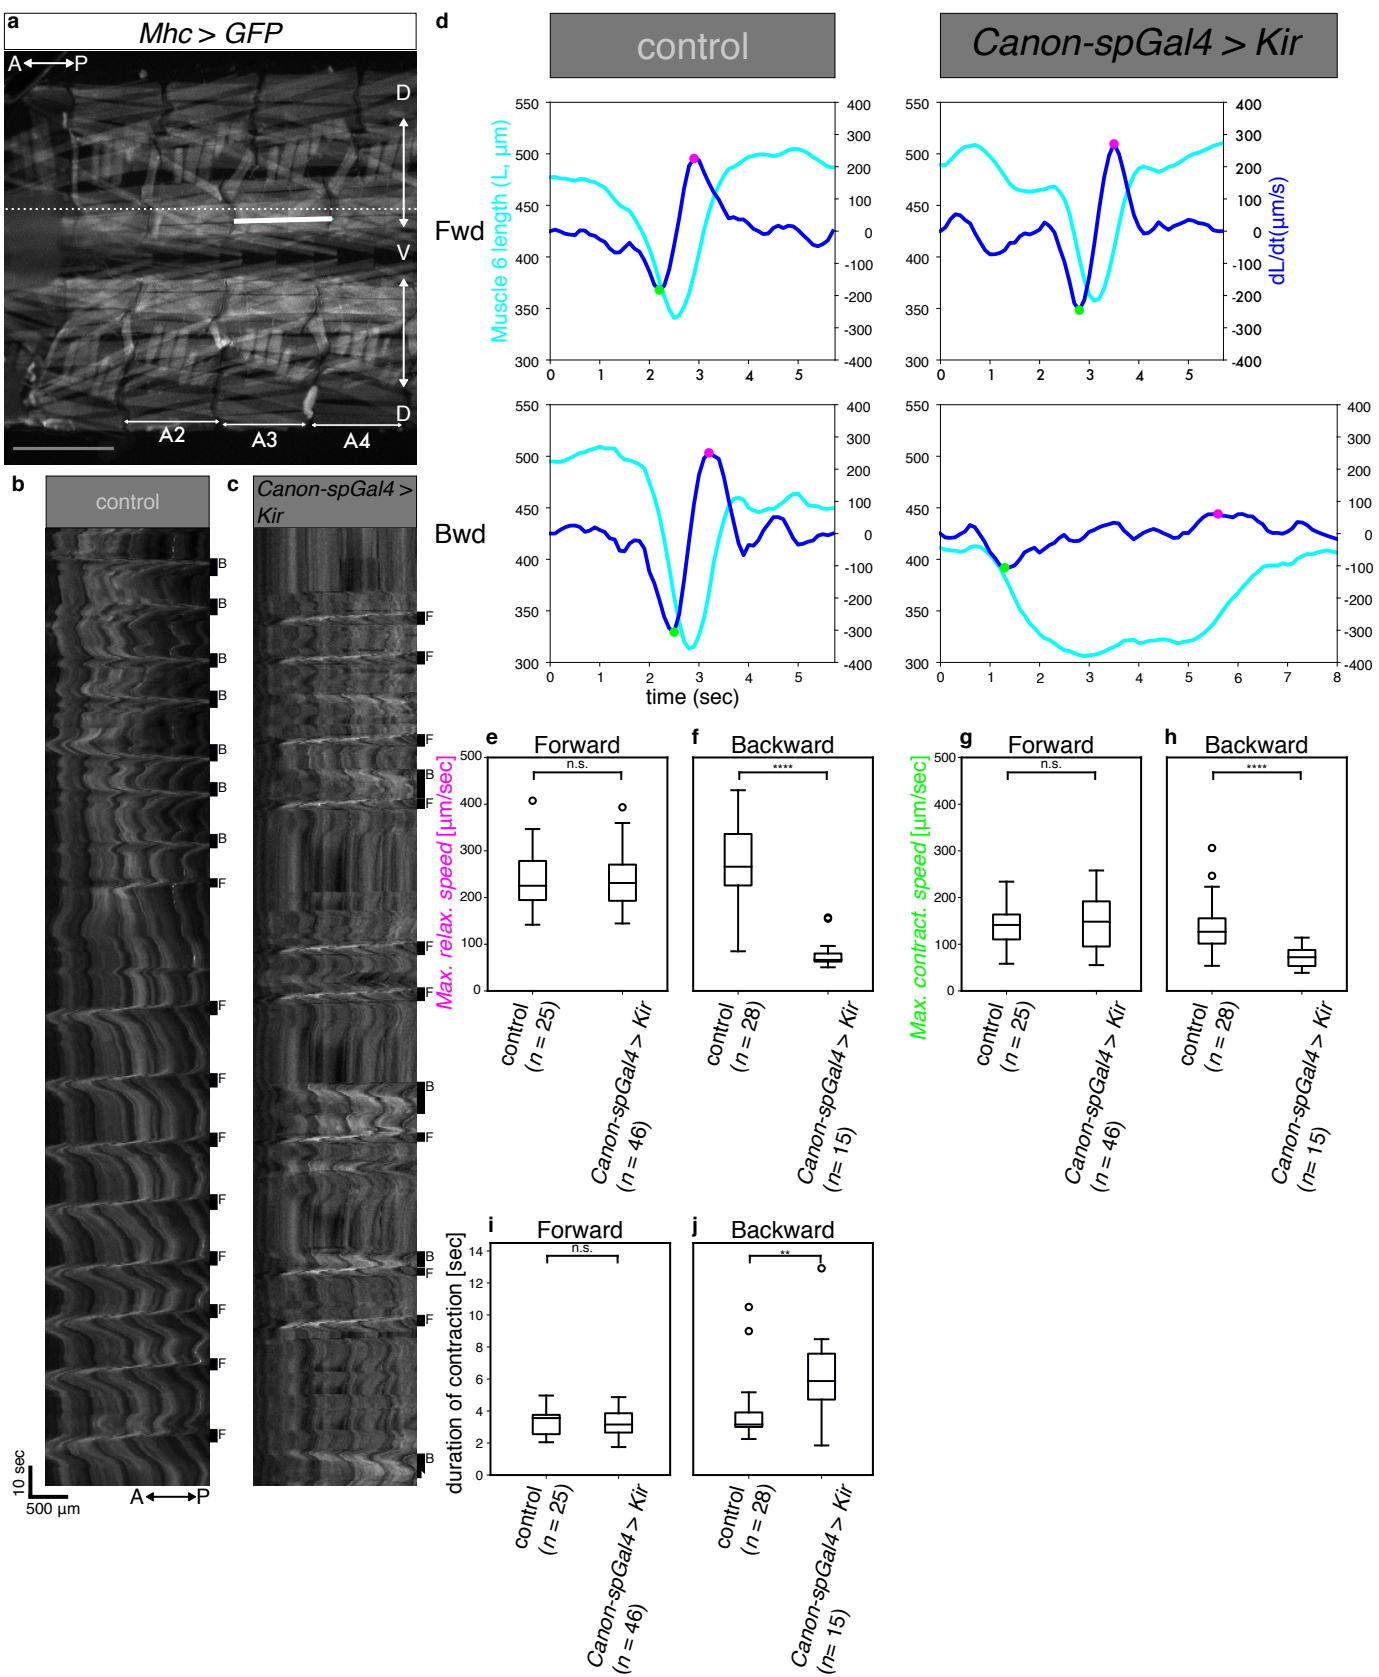

Fig. 4

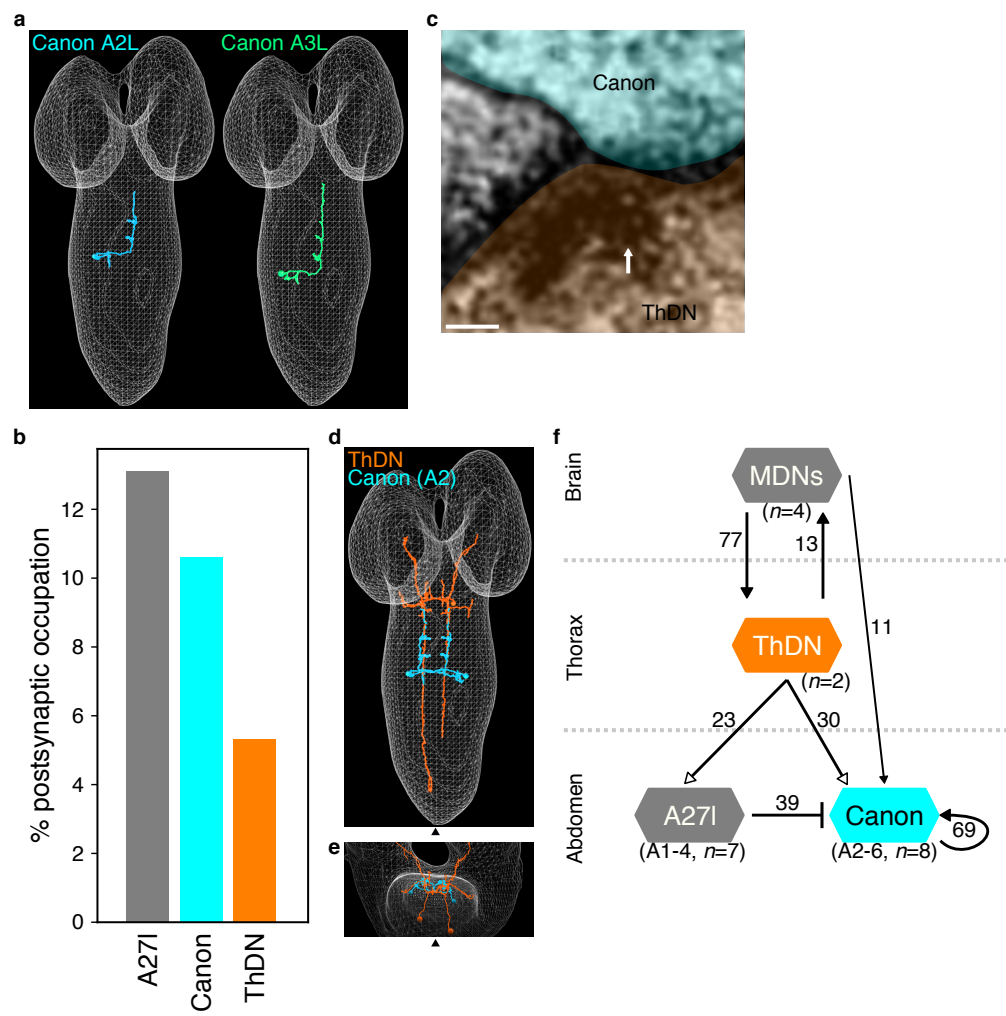

**Fig.5**

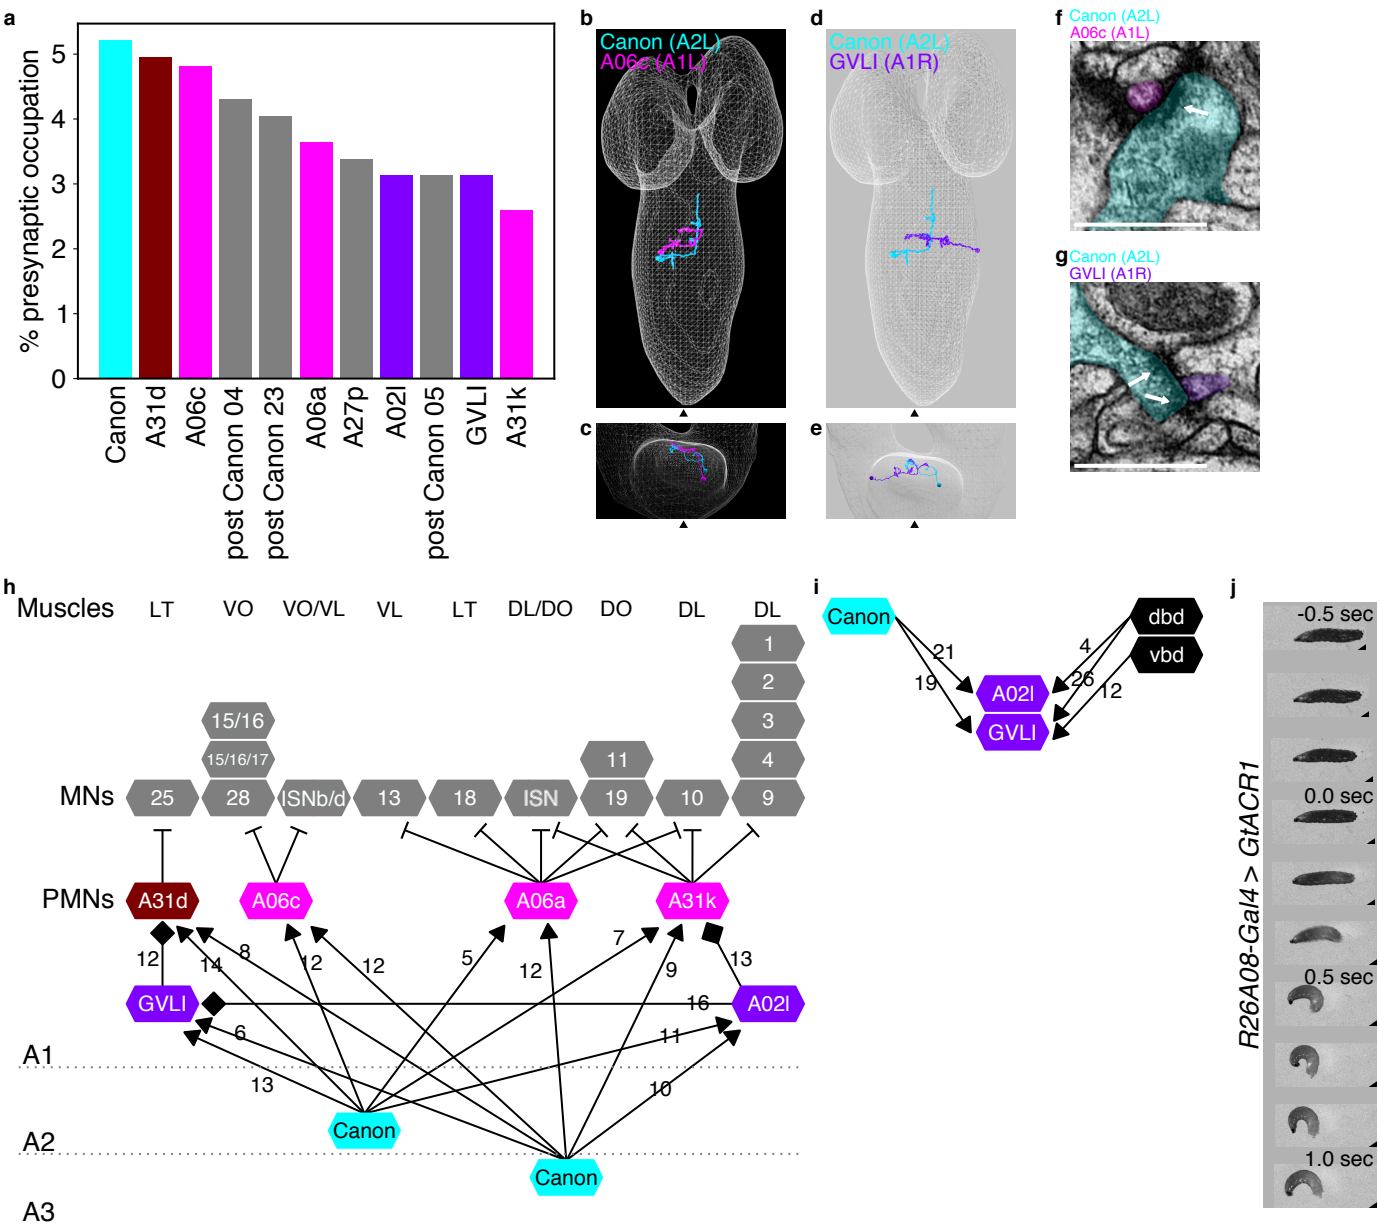

**Fig.6**

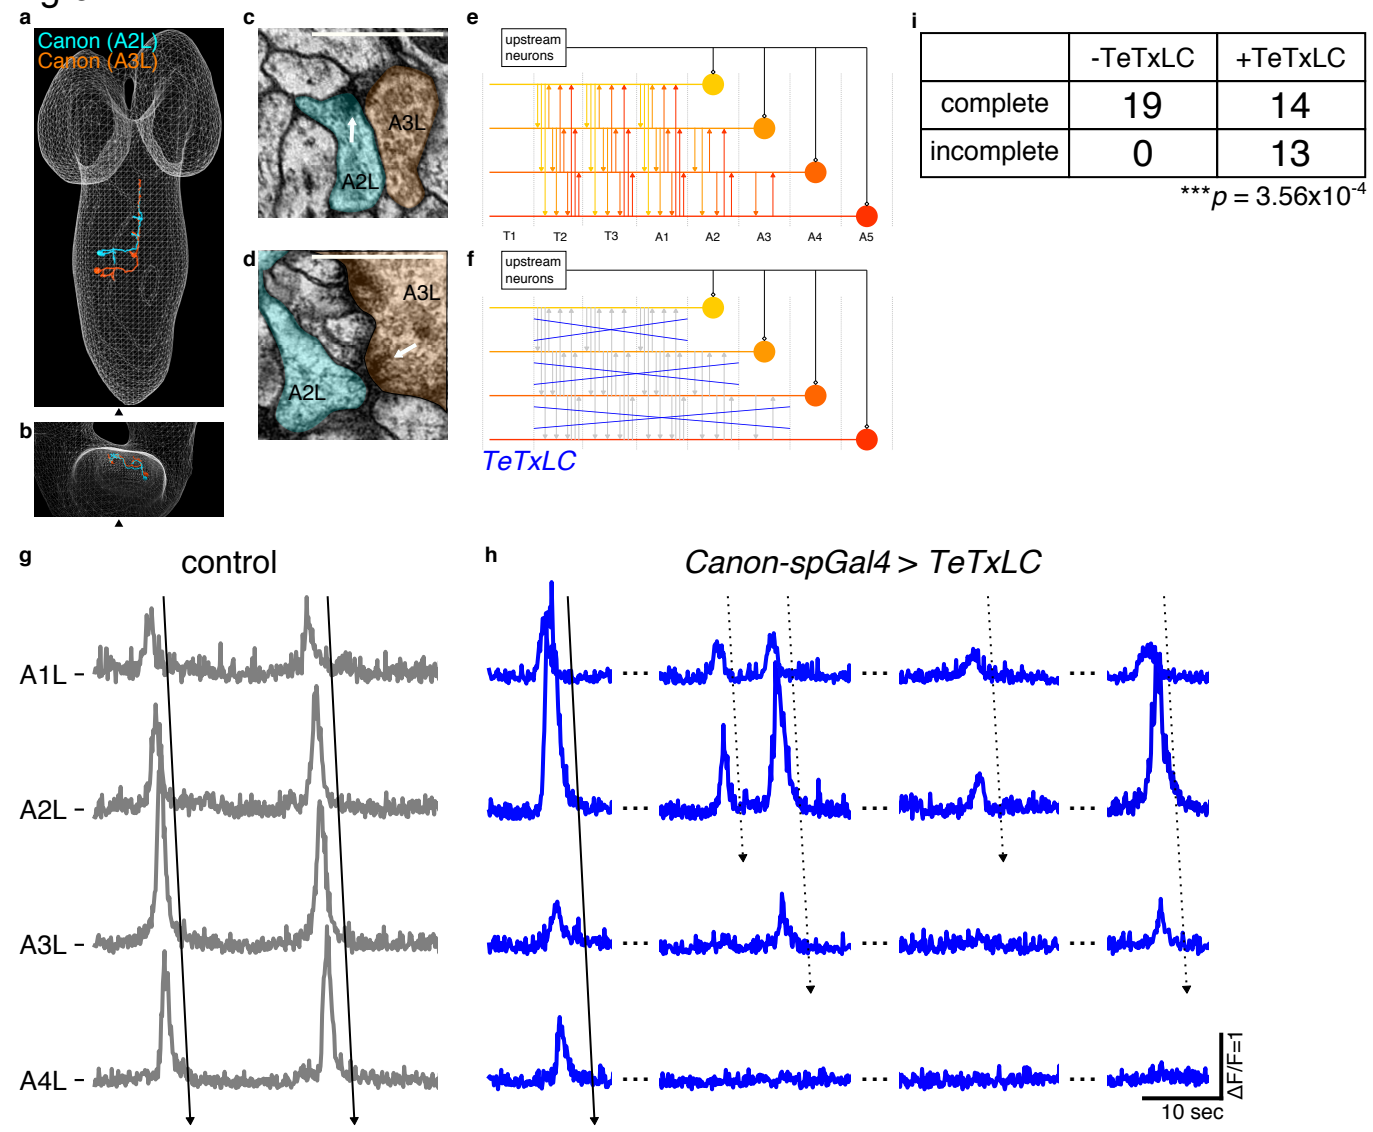



Fig. 7

backward peristalsis

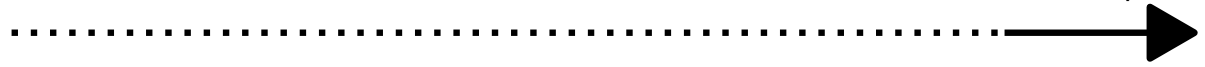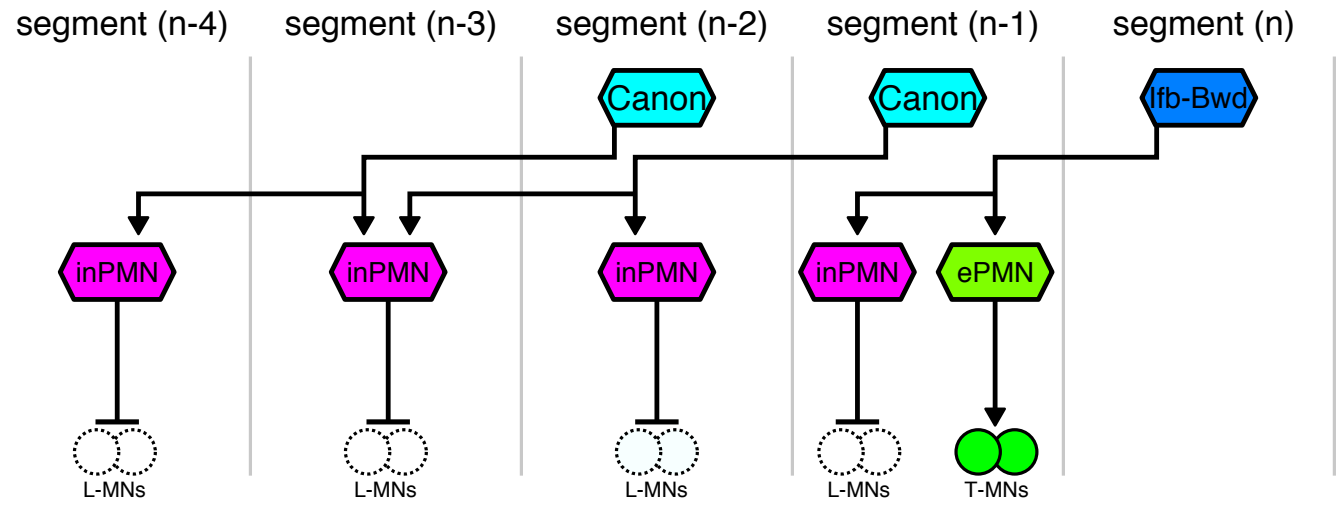

Source: http://biorxiv.org/content/10.1101/2021.03.08.434356v1.full.pdf
